# Supplementary material for: Effects of traditional agroecosystems and grazing areas on amphibian diversity in a region of central Mexico
Source: PeerJ. 2019 Feb 15;7:e6390. doi: 10.7717/peerj.6390 (PMC6378913; doi:10.7717/peerj.6390)
Supplement: Supplemental Information 1 — The richness and abundance of the species found in four types of vegetation on 12 field trips. [file peerj-07-6390-s001.xlsx]

## Sheet: Hoja1
	Sampling trips												Total abundance by species
Vegetation types	1	2	3	4	5	6	7	8	9	10	11	12
Mountain cloud forest (MCF)
Rhinella horribilis	0	0	0	0	0	0	0	1	1	0	0	0	2
Incilius nebulifer	0	0	0	0	0	0	0	0	0	0	2	0	2
I. valliceps	7	0	0	0	0	0	0	0	0	0	10	5	22
Craugastor augusti	0	0	0	0	0	0	0	2	0	0	0	0	2
C. decoratus	0	0	0	0	1	0	0	0	0	0	0	0	1
C. rodophis	0	0	0	0	0	0	0	0	3	0	4	4	11
Eleutherodactylus longipes	3	0	0	0	0	0	0	0	0	0	0	0	3
E. verrucipes	0	0	0	0	0	0	0	0	0	2	0	2	4
Ecnomiohyla miotympanum	0	0	0	0	0	0	0	0	0	5	5	0	10
Smilisca baudinni	1	0	0	0	4	0	0	0	0	0	14	0	19
Rana berlandieri	7	0	0	0	0	0	0	0	0	0	0	0	7
Aquiloeurycea cephalica	0	0	0	0	0	0	0	0	1	0	0	0	1
Tropical evergreen forest (TEF)
Rhinella horribilis	17	19	0	0	0	0	0	0	0	0	0	0	36
Incilius nebulifer	25	4	0	0	0	8	0	0	0	0	0	1	38
I. valliceps	0	10	0	0	0	4	0	0	0	0	0	0	14
Eleutherodactylus verrucipes	0	1	1	4	4	0	0	0	0	0	0	2	12
Ecnomiohyla miotympanum	51	0	0	1	7	0	0	0	10	0	0	0	69
Smilisca baudinni	0	1	0	0	0	1	0	2	0	2	0	14	20
Rana berlandieri	7	2	0	3	0	0	0	0	3	3	0	7	25
R. jonhi	2	1	0	0	0	0	0	0	0	14	0	0	17
Bolitoglossa platydactyla	1	0	0	0	0	0	0	0	1	0	0	0	2
Shaded-grown coffee
Rhinella horribilis	0	0	0	0	11	0	0	0	0	3	1	4	19
Incilius nebulifer	0	0	4	0	0	0	0	2	0	1	0	0	7
I. valliceps	0	0	0	0	0	0	3	0	3	0	0	0	6
Eleutherodactylus longipes	1	2	0	0	0	0	0	0	0	0	0	0	3
E. verrucipes	3	0	0	0	0	3	1	0	2	0	2	0	11
E. miotympanum	0	2	0	0	0	0	4	0	0	4	0	0	10
Smilisca baudinii	0	0	0	0	0	3	0	0	0	0	0	0	3
Rana berlandieri	0	0	0	0	0	0	7	0	0	0	2	3	12
R. jonhi	0	0	0	0	0	6	0	0	0	0	0	1	7
Milpa Huasteca (MH)
Rhinella horribilis	15	0	0	0	0	0	0	0	0	0	1	0	16
Incilius nebulifer	10	0	0	0	0	0	0	0	0	2	0	0	12
I. valliceps	10	0	0	0	0	0	0	0	0	0	0	1	11
Craugastor augusti	0	0	0	0	0	0	7	0	2	0	2	0	11
Eleutherodactylus longipes	0	0	0	0	0	2	0	0	0	0	1	0	3
R. verrucipes	11	0	0	0	0	0	0	3	0	2	0	0	16
Grazing areas (GA)
Rhinella horribilis	8	0	16	0	0	10	0	0	0	2	4	7	47
Incilius nebulifer	4	0	1	0	0	0	0	0	0	1	0	0	6
Incilius valliceps	0	0	0	0	4	0	0	0	0	0	0	0	4
Ecnomiohyla miotympanum	15	0	0	0	0	14	0	0	0	0	7	0	36
Smilisca baudinii	0	0	1	0	0	0	0	0	0	0	0	8	9
Rana berlandieri	4	0	6	0	0	0	0	0	0	0	0	0	10
R. jonhi	0	0	2	0	0	0	0	0	0	6	0	7	15
